# Supplementary material for: miR-1199-5p and Zeb1 function in a double-negative feedback loop potentially coordinating EMT and tumour metastasis
Source: PubMed Central journal article supplement (PMC5660124; doi:10.1038/s41467-017-01197-w), 2017-10-27
Supplement: 41467_2017_1197_MOESM1_ESM.pdf [file 41467_2017_1197_MOESM1_ESM.pdf]

## Supplemental Information

## Supplemental Figures

## Supplementary Figure 1

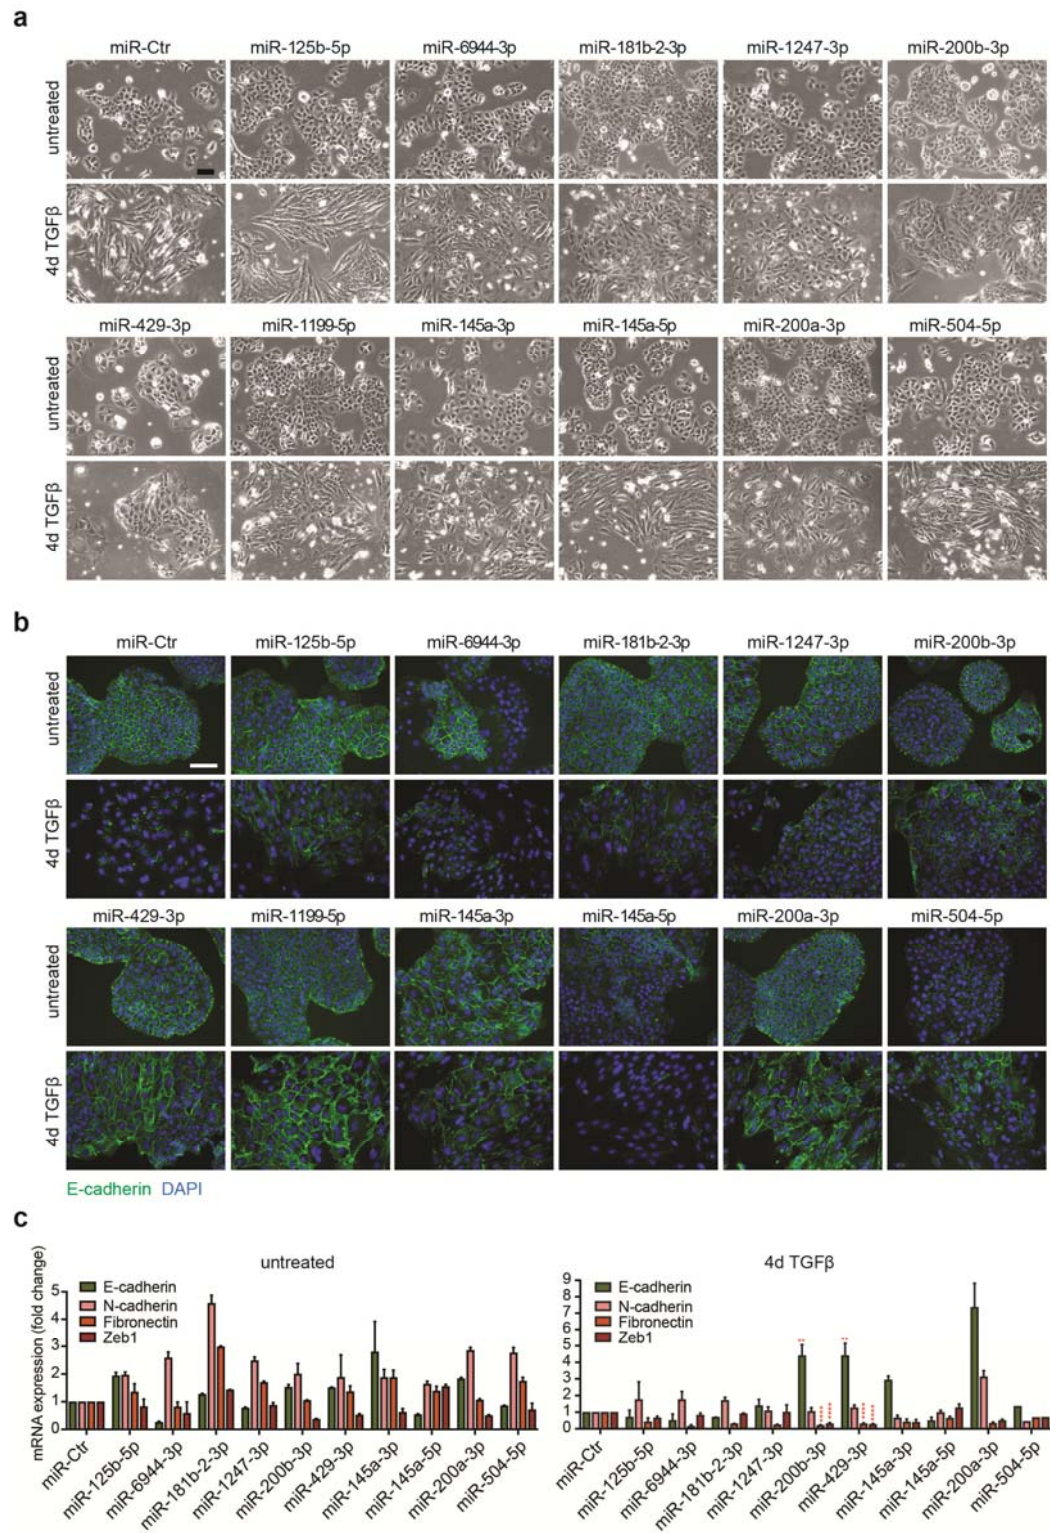

**Supplementary Fig. 1** Phenotypic screen for miRNAs affecting a TGFβ-induced EMT.

**(a)** Bright field images of NMuMG/E9 cells transfected with miRNA mimics as indicated. NMuMG/E9 cells were cultured in the absence (*top*) or presence of TGF $\beta$  (4 days; *bottom*). Scale bar: 100 $\mu$ m.

**(b)** Immunofluorescence microscopy images of NMuMG/E9 cells cultured and treated as described in (a) and stained for the epithelial marker E-cadherin (*green*). DAPI was used to visualise nuclei. Scale bar: 100 $\mu$ m.

**(c)** Epithelial (E-cadherin) and mesenchymal (N-cadherin, Fibronectin, Zeb1) gene expression was analysed by quantitative RT-PCR in NMuMG/E9 cells cultured and treated as described in (a). Data are presented as mean fold changes  $\pm$  s.e.m.; n=2 (miR-504-5p: n=1; miR-200b/429-3p 4d TGF $\beta$ : n=4); significance determined by an unpaired, two-sided t-test; \*\*P < 0.01, \*\*\*\*P < 0.0001.

## Supplementary Figure 2

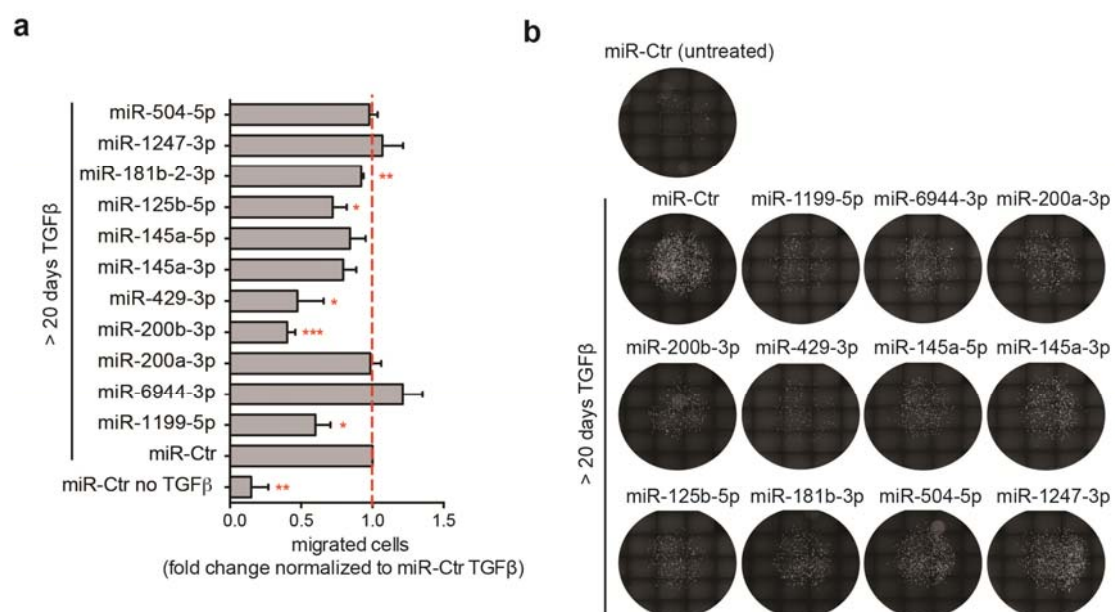

**Supplementary Fig. 2** Identification of miRNAs regulating mesenchymal tumour cell migration.

**(a)** Quantification of migrated epithelial (no TGF $\beta$ ) and mesenchymal (> 20 days TGF $\beta$ ) Py2T cells transfected with the miRNA mimics indicated in a 96-well plate format. The graph summarizes the number of migrated cells per insert normalized to the total cell number (input plate). Data were normalized to miR-Ctr transfected cells (+TGF $\beta$ ; red line) and are presented as mean fold

changes +/- s.e.m.; n=3, significance determined by an unpaired, two-sided t-test \*P < 0.05, \*\*P < 0.01, \*\*\*P < 0.001.

**(b)** Representative immunofluorescence images of migrated epithelial (untreated) and mesenchymal (> 20 days TGF $\beta$ ) Py2T cells from the experiment described in (a). Nuclei were visualized with DAPI staining and the bottom of the trans-well migration inserts were imaged by fluorescence microscopy.

## Supplementary Figure 3

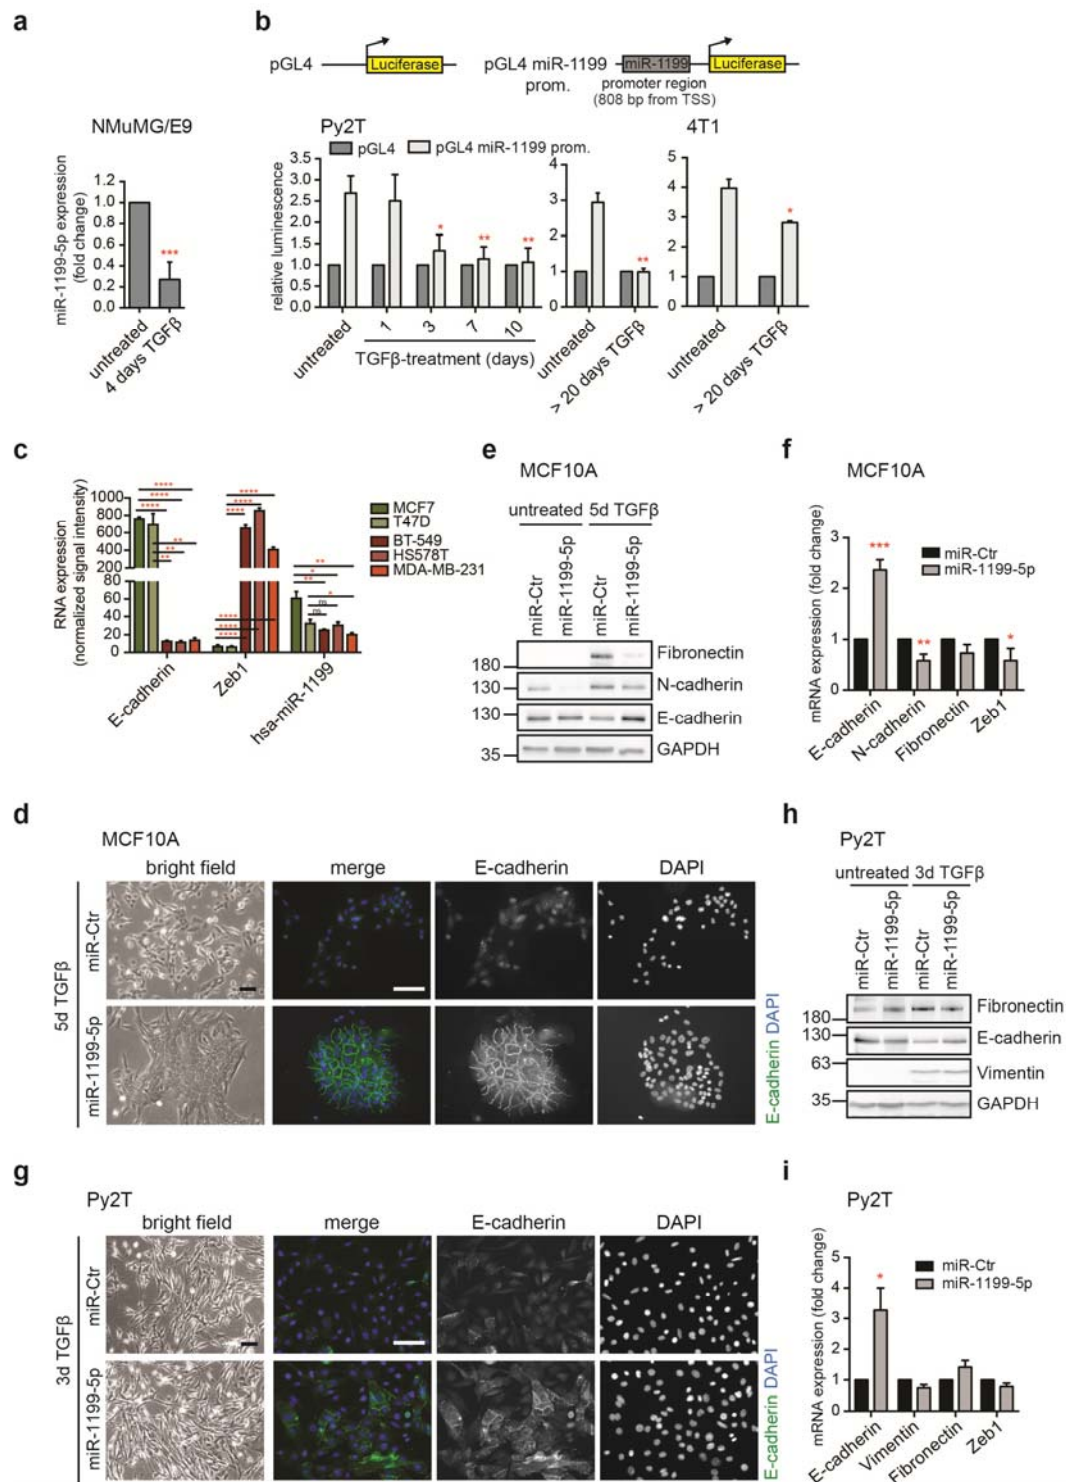

**Supplementary Fig. 3** Ectopic expression of miR-1199-5p affects EMT and cell migration.

(a) NMuMG/E9 cells were cultured in the absence (untreated) and presence of TGF $\beta$  (4 days TGF $\beta$ ). miRNA-1199-5p expression levels were analysed by

RT-PCR (mean fold changes  $\pm$  s.e.m.; n=4; significance determined by an unpaired, two-sided t-test \*\*\*P < 0.001).

**(b)** *Top*: Schematic representation of the miR-1199 promoter luciferase reporter constructs. *Bottom*: Py2T (*left*) and 4T1 (*right*) cells were treated with TGF $\beta$  for the time points indicated. Cells were transfected with a *Renilla* luciferase reporter along with either a miR-1199-promoter *Firefly* luciferase-reporter (pGL4 miR-1199 promoter) or a control reporter (pGL4) construct. Relative luminescence (*Firefly/Renilla*) was calculated and normalized to the control reporter (mean fold changes  $\pm$  s.e.m.; n=3; significance determined by an unpaired, two-sided t-test \*P < 0.05, \*\*P < 0.01).

**(c)** Hsa-miR-1199 expression analysis in human breast cancer cell lines. RNA expression (normalized array signal intensity) profiles of E-cadherin, Zeb1 and miR-1199 in epithelial (green) and mesenchymal (red) breast cancer cell lines.

**(d-f)** Ectopic expression of human miR-1199-5p blocks TGF $\beta$ -induced EMT in MCF10A cells. (d) Representative bright field and immunofluorescence images of MCF10A cells transfected with the miRNA mimics indicated. Cells were cultured in the presence of TGF $\beta$  for 5 days. Localization of E-cadherin was analysed by immunofluorescence microscopy. DAPI was used to stain nuclei. Scale bar: 100 $\mu$ m. (e) Immunoblot analysis for the EMT markers indicated on the cells described in (d). GAPDH was used as loading control. (f) RT-PCR analysis for the EMT markers indicated was examined in the cells described in (d). Data are presented as mean fold changes  $\pm$  s.e.m.; n=3; significance determined by an unpaired, two-sided t-test \*P < 0.05, \*\*P < 0.01, \*\*\*P < 0.001.

**(g-i)** Ectopic expression of miR-1199-5p delays TGF $\beta$ -induced EMT in Py2T cells. Cell morphology and E-cadherin immunofluorescence staining (g) and EMT marker expression analyses by immunoblotting (h) and RT-PCR (i) were performed as described for MCF10A cells in (d-f).



Supplementary Figure 4

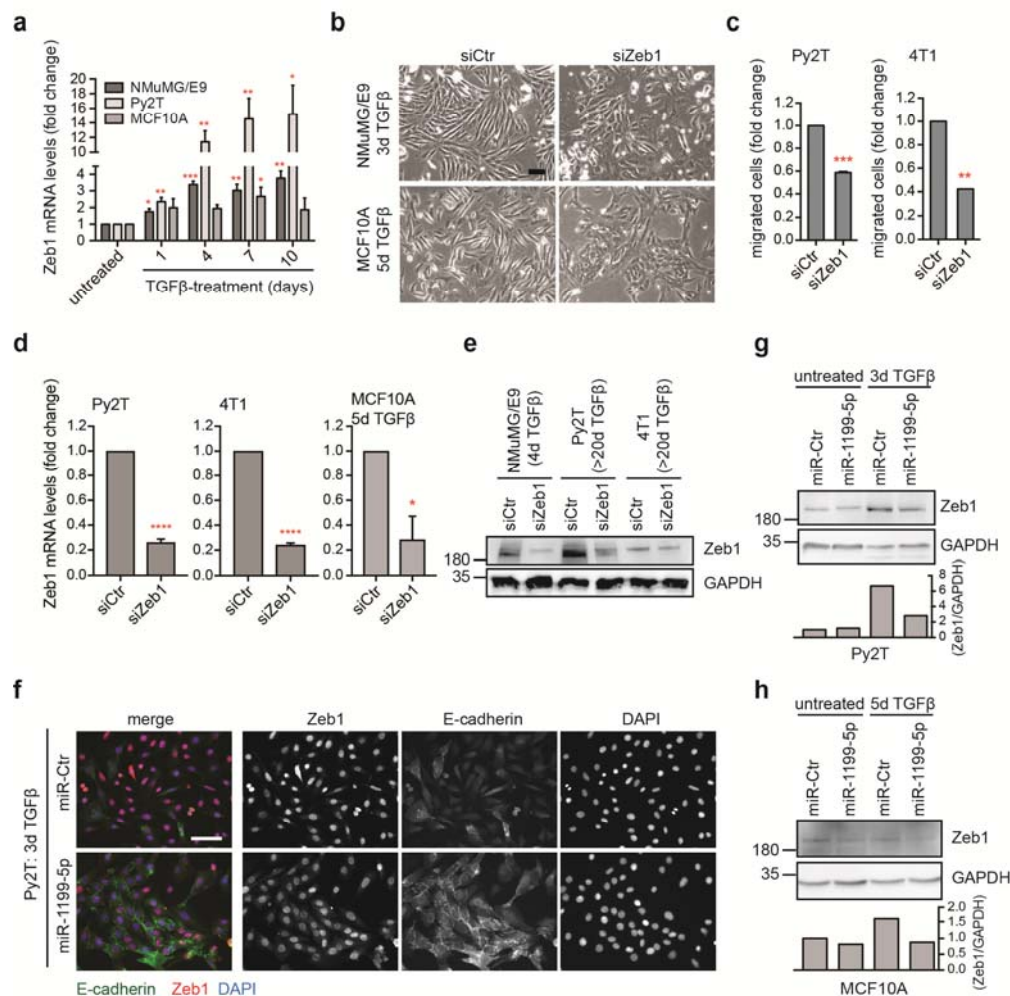

### Supplementary Fig. 4 Regulation and function of Zeb1 during an EMT.

**(a)** Zeb1 transcript levels increase upon a TGF $\beta$ -induced EMT in different cellular systems. mRNA levels of Zeb1 were determined by RT-PCR analysis in NMuMG/E9, Py2T and MCF10A cells treated with TGF $\beta$  for the time points indicated. Data present mean fold changes  $\pm$  s.e.m.; n=3; for MCF10A 4d TGF $\beta$ : n=2; significance determined by an unpaired, two-sided t-test \*P < 0.05, \*\*P < 0.01, \*\*\*P < 0.001.

**(b)** Loss of Zeb1 blocks TGF $\beta$ -induced EMT. Bright field images illustrate morphological differences of NMuMG/E9 (*top*) and MCF10A (*bottom*) cells transfected with a siRNA against Zeb1 or a negative control. Cells were cultured in the presence of TGF $\beta$  for 4 (NMuMG/E9) or 5 days (MCF10A). Scale bar: 100 $\mu$ m.

**(c)** Loss of Zeb1 reduces cancer cell migration. Mesenchymal (> 20 days TGF $\beta$ ) Py2T (*left*) and 4T1 (*right*) cells were transfected with the siRNAs indicated and plated in a FCS gradient of a Boyden chamber trans-well migration insert. After 18 hours, trans-migrated cells per insert were quantified. Results present mean fold changes +/- s.e.m.; n=3; significance determined by an unpaired, two-sided t-test \*\*P < 0.01, \*\*\*P < 0.001.

**(d,e)** Analysis of Zeb1 knockdown efficiencies. Mesenchymal Py2T and 4T1 cells as well as MCF10A cells and NMuMG/E9 cells were transfected and cultured as described in (b,c). Quantitative RT-PCR (mean fold changes; n=3; significance determined by an unpaired, two-sided t-test \*P < 0.05, \*\*\*\*P < 0.0001.) (d) and immunoblotting analyses (e) were used to analyse siRNA-mediated knockdown of Zeb1.

**(f-h)** Forced expression of miR-1199-5p reduces Zeb1 protein levels. Py2T and MCF10A cells were transfected with a miR-Ctr or mmu-miR-1199-5p (Py2T) or hsa-miR-1199-5p (MCF10A) mimic and cultured in the absence (untreated) or presence of TGF $\beta$  (Py2T: 3 days; MCF10A: 5 days). Immunofluorescence analysis in Py2T cells (f) and immunoblotting analysis in Py2T (g) and MCF10A (h) cells were used to assess Zeb1 protein levels. (g,h) Top: immunoblotting analysis. Bottom: quantification of Zeb1 protein levels (fold change) from immunoblotting and subsequent normalization to GAPDH protein levels. Scale bar: 100 $\mu$ m.

## Supplementary Figure 5

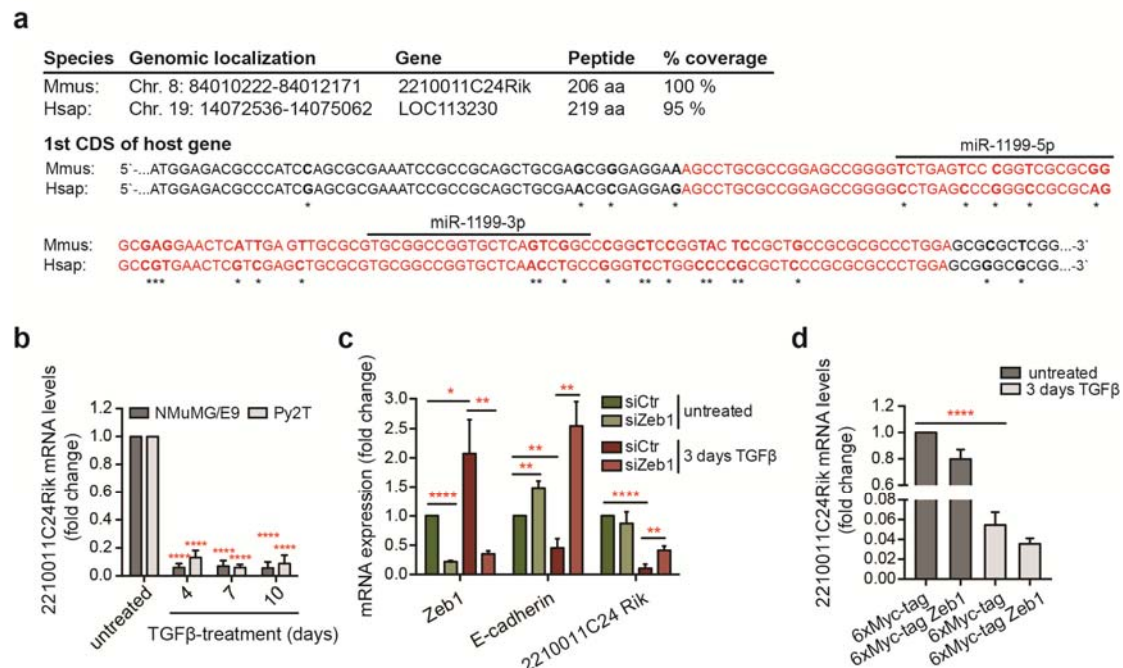

**Supplementary Fig. 5** The miR-1199 host gene 2210011C24Rik: Co-regulation and conserved genomic localization.

**(a) Top:** Localization, peptide length (aa) and cDNA similarities (coverage in %) of miR-1199 host genes in the human (Hsap) and murine (Mmus) genome. **Bottom:** Sequence alignment of murine and human miR-1199 gene sequences (red) within the first CDS of its host gene. Differences in nucleotides within both sequences are marked with \* and miR-1199-5p/-3p sequences within the miR-1199 gene are highlighted.

**(b)** 2210011C24Rik transcript levels decrease during a TGF $\beta$ -induced EMT. mRNA levels of 2210011C24Rik were quantified by RT-PCR analysis in NMuMG/E9 and Py2T cells treated with TGF $\beta$  for the time points indicated. Data are presented as mean fold changes  $\pm$  s.e.m.; n = 4; significance determined by an unpaired, two-sided t-test \*\*\*\*P < 0.0001.

**(c)** Loss of Zeb1 blocks TGF $\beta$ -induced EMT and induces a delay in 2210011C24Rik mRNA downregulation. NMuMG/E9 cells were transfected with a siRNA against Zeb1 or a negative control and cultured in the absence (untreated; green) or presence of TGF $\beta$  (3 days; red). Transcript levels of Zeb1, E-cadherin and 2210011C24Rik were determined by RT-PCR analysis. Data are presented as mean fold changes  $\pm$  s.e.m.; n=3; significance



determined by an unpaired, two-sided t-test \*P < 0.05, \*\*P < 0.01, \*\*\*\*P < 0.0001.

**(d)** Forced expression of Zeb1 moderately diminishes 2210011C24Rik expression. NMuMG/E9 cells were transiently transfected with a 6xMyc-tag Zeb1 or a 6xMyc-tag control construct and cultured in the absence (untreated) or presence of TGF $\beta$  (3 days). Transcript levels of 2210011C24Rik were quantified by RT-PCR analysis (mean fold changes +/- s.e.m.; n=3; significance determined by an unpaired, two-sided t-test \*\*\*\*P < 0.0001).

## Supplementary Figure 6

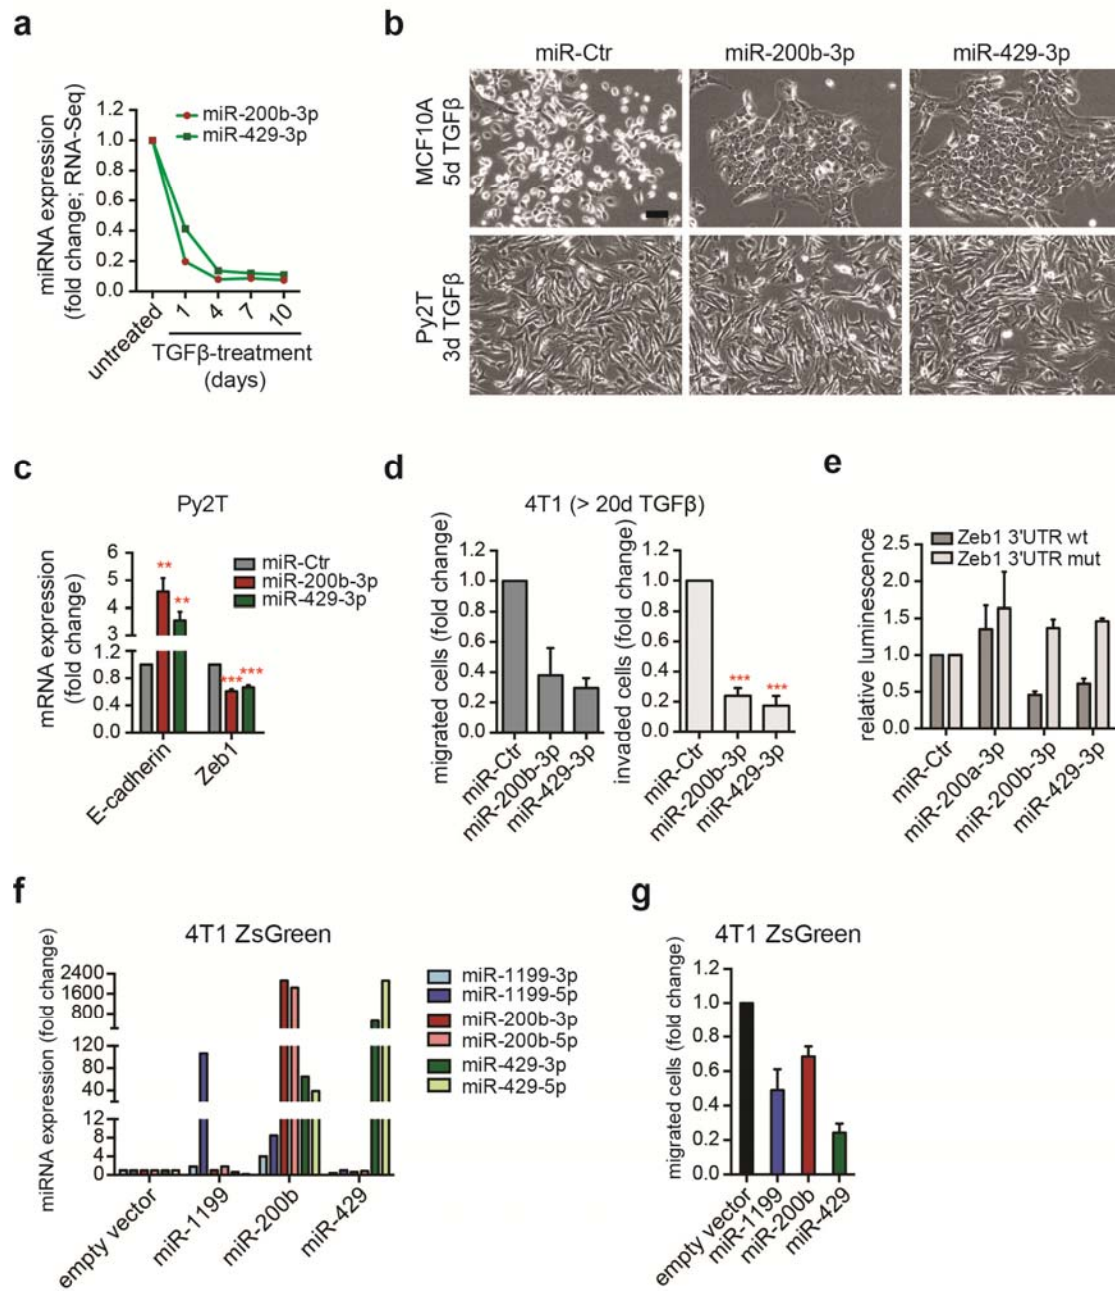

**Supplementary Fig. 6** miR-200b-3p and miR-429-3p regulation and function during an EMT.

**(a)** MiR-200b-3p and miR-429-3p transcript levels decrease during an EMT. Expression profiles (mean fold changes) of miR-200b-3p (*red dots*) and miR-429-3p (*green squares*) during a TGF $\beta$ -induced EMT of NMuMG/E9 cells measured by RNA-sequencing analysis.

**(b)** Representative bright field images of MCF10A and Py2T cells transfected with the miRNA mimics indicated. Cells were cultured in the presence of TGF $\beta$  for 5 or 3 days, respectively. Scale bar: 100 $\mu$ m.

**(c)** RT-PCR analysis of EMT marker mRNA expression Py2T cells. Cells were transfected and cultured as described in (b). Data are presented as mean fold changes  $\pm$  s.e.m. (n=3; significance determined by an unpaired, two-sided t-test \*\*P < 0.01, \*\*\*P < 0.001).

**(d)** Forced expression of miR-200b-3p and miR-429-3p reduces cancer cell migration and invasion. Mesenchymal 4T1 cells (> 20 days TGF $\beta$ ) were transfected with the miRNA mimics indicated and plated in a FCS gradient of a Boyden chamber trans-well migration (*left*) or invasion (*right*) insert. The numbers of trans-migrated/invaded cells were quantified. Graphs represent the mean fold changes  $\pm$  s.e.m. compared to miR-Ctr transfected cells (migration: n=2; invasion: n=3; significance determined by an unpaired, two-sided t-test \*\*\*P < 0.001).

**(e)** Post-transcriptional regulation of Zeb1 by miR-200b-3p and miR-429-3p. NMuMG/E9 cells were transfected with the miRNA mimics indicated, a *Renilla* luciferase reporter construct and with either a wild type or a mutant Zeb1-3'UTR *Firefly* luciferase-reporter construct. Relative luminescence (*Firefly/Renilla*) was calculated and normalized to miR-Ctr transfected cells (mean fold changes  $\pm$  s.e.m.; n=2).

**(f)** Stable co-expression of ZsGreen and miR-1199, miR-200b or miR-429 or ZsGreen alone (empty vector) in 4T1 cells. Quantitative RT-PCR was used to analyse miR-1199-5p/-3p, miR-200b-3p/-5p and miR-429-3p/5p expression. Data are presented as fold changes compared to empty vector-transduced cells (n=1).

**(g)** Stable expression of miR-1199, miR-200b or miR-429 in 4T1 cells reduces trans-well cell migration. 4T1 cells described in (f) were treated with TGF $\beta$  for 3 days and plated within a FCS gradient on Boyden chamber migration inserts. The numbers of transmigrated cells were quantified. Depicted are mean fold changes  $\pm$  s.e.m.; n=2.

Supplementary Figure 7

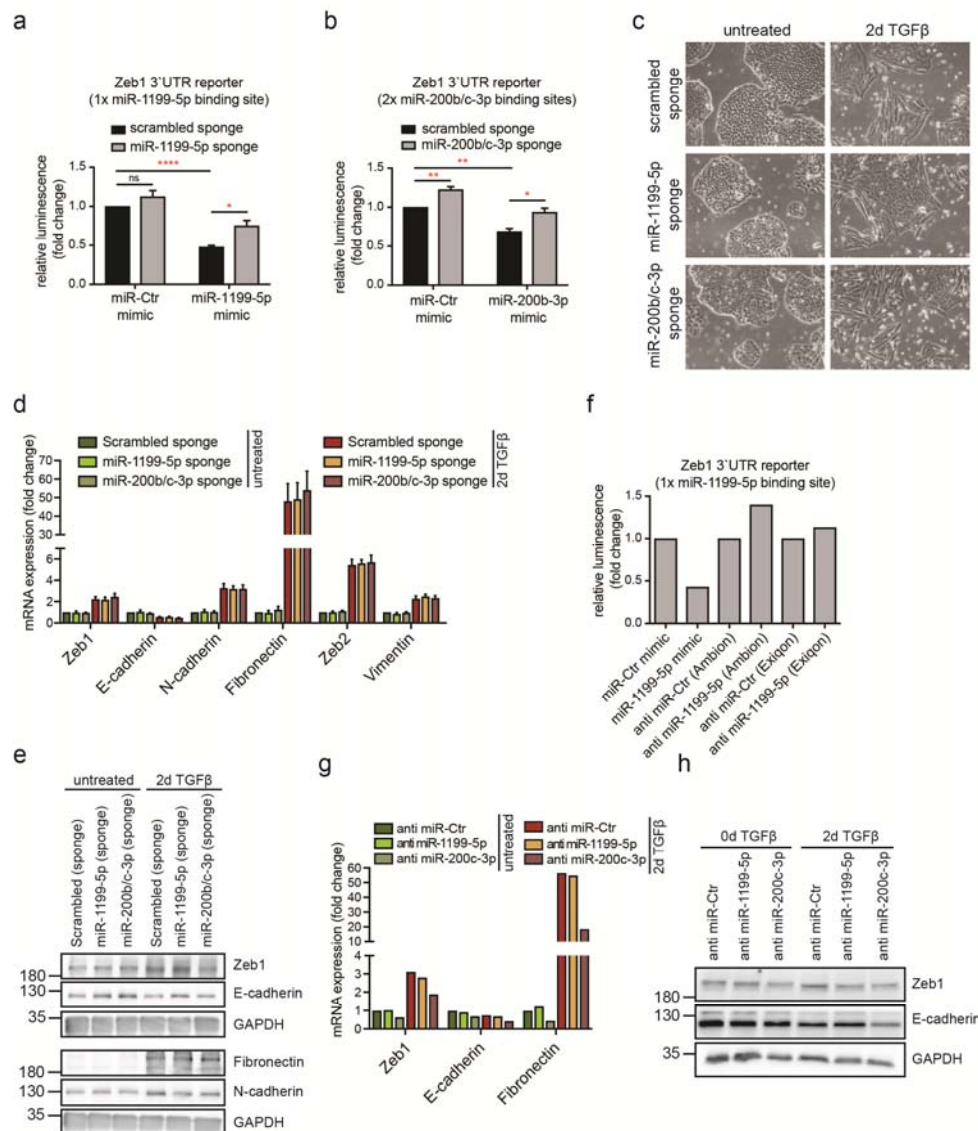

**Supplementary Fig. 7** Inhibition of miR-1199-5p and miR-200b/c-3p during EMT.

**(a-b)** miR1199-5p and miR-200b/c-3p sponge constructs are functional. NMuMG/E9 cells were transiently transfected with a miR-1199-5p, a miR-200b-3p or a miR-Ctr mimic along with the miRNA sponge constructs indicated and with a Zeb1 3'UTR *Firefly* luciferase reporter construct exhibiting one miR-1199-5p seed sequence (a) or two miR-200b/429-3p seed sequences (b). Cells were co-transfected with a Renilla luciferase reporter and fold changes +/- s.e.m. of relative luminescence (Firefly/Renilla

luminescence) were calculated (n=3; significance determined by an unpaired, two-sided t-test \*P < 0.05, \*\*P < 0.01, \*\*\*P < 0.001).

**(c-e)** Loss of miR-1199-5p or miR-200b/c-3p is not sufficient to induce an EMT. NMuMG/E9 cells were transiently transfected with the miRNA sponge constructs indicated. (c) Bright field images of NMuMG/E9 cells cultured in the absence and presence of TGF $\beta$ . Quantitative RT-PCR (d; data are presented as mean fold changes +/- s.e.m.; n=3) and immunoblotting (e) analysis was performed for the expression of different EMT markers.

**(f-h)** NMuMG/E9 cells were transiently transfected with a miR-Ctr, miR-1199-5p or a miR-200c-3p inhibitor from two different companies (Ambion and Exiqon). (f) A Zeb1 3'UTR *Firefly* luciferase reporter with one miR-1199-5p binding site was used as described in (a) (n=1). Quantitative RT-PCR (g; data are presented as mean fold changes +/- s.e.m.; n=3) and immunoblotting (h) analyses was performed for the expression of different EMT markers.

## Supplementary Figure 8

### Source data, western blots

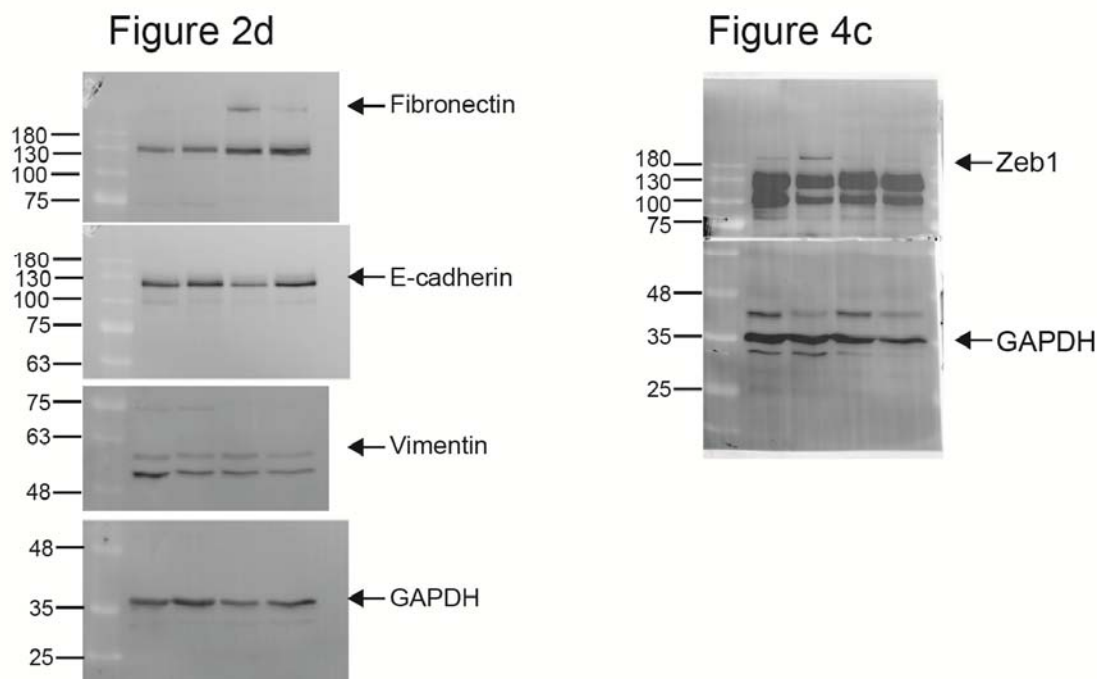

**Supplementary Fig. 8** Uncropped scans from the immunoblotting results presented in the main figures.



**Supplementary Table 1:** Predicted direct target genes of miR-1199-5p during an EMT.

Summarized are the 66 genes which are: a) predicted to be direct targets of miR-1199-5p by miRWalk2.0 (predicted targets in at least seven out of 13 prediction databases with a predicted seed sequence in the 3'UTR, 5'UTR or CDS) and b) display reduced transcript levels upon forced expression of miR-1199-5p in NMuMG/E9 cells at 4 days of TGF $\beta$ -treatment (RNA-sequencing analysis; log<sub>2</sub>FC (-1), FDR < 0.05).

| Gene          | miR-1199-5p         |          |
|---------------|---------------------|----------|
|               | log <sub>2</sub> FC | FDR      |
| Pitpnm3       | -3.865              | 9.24E-29 |
| Col5a1        | -3.805              | 3.53E-31 |
| Asic1         | -3.584              | 2.33E-09 |
| Chrna1        | -3.532              | 8.61E-10 |
| Padi3         | -3.048              | 6.16E-19 |
| Megf10        | -2.978              | 1.71E-10 |
| Pik3cd        | -2.714              | 7.26E-17 |
| Havcr2        | -2.688              | 2.48E-07 |
| Gprc5b        | -2.511              | 1.34E-06 |
| Gpc6          | -2.424              | 2.49E-12 |
| Pdgfrb        | -2.397              | 4.49E-12 |
| Cdk18         | -2.337              | 1.52E-38 |
| Spn           | -2.245              | 4.97E-27 |
| Sepn1         | -2.234              | 7.08E-43 |
| Cmah          | -2.174              | 6.19E-05 |
| Zeb1          | -2.065              | 1.60E-21 |
| Zfp9          | -2.054              | 1.71E-14 |
| Sox12         | -2.034              | 2.76E-09 |
| Il12rb1       | -2.029              | 1.09E-07 |
| Fbxo32        | -1.810              | 2.15E-10 |
| 8430408G22Rik | -1.803              | 1.32E-02 |
| Atp2b4        | -1.767              | 1.51E-17 |
| Gm14137       | -1.712              | 2.61E-08 |
| Slc7a11       | -1.642              | 3.35E-04 |
| Pkp1          | -1.619              | 1.66E-03 |
| Oasl2         | -1.602              | 4.18E-07 |
| Gpr157        | -1.552              | 2.78E-06 |
| Map3k1        | -1.534              | 3.00E-08 |
| Cds1          | -1.529              | 1.90E-06 |
| Pla2g16       | -1.502              | 7.76E-07 |
| Xdh           | -1.487              | 1.69E-06 |
| Plac1         | -1.484              | 2.89E-05 |
| Cdon          | -1.471              | 1.50E-13 |

|          |        |          |
|----------|--------|----------|
| Slc35f1  | -1.470 | 5.85E-06 |
| St8sia1  | -1.443 | 7.58E-05 |
| Cdk5r1   | -1.437 | 2.19E-06 |
| Elovl6   | -1.418 | 5.99E-09 |
| Klhl14   | -1.394 | 2.15E-02 |
| Slc25a36 | -1.383 | 7.32E-09 |
| Mex3a    | -1.382 | 6.78E-15 |
| Ncs1     | -1.364 | 1.48E-15 |
| Fosl2    | -1.345 | 1.91E-13 |
| Sorcs2   | -1.336 | 1.92E-03 |
| Cd28     | -1.331 | 3.03E-03 |
| Nav1     | -1.310 | 1.98E-05 |
| Dnm1     | -1.273 | 2.38E-03 |
| Sall2    | -1.273 | 1.22E-06 |
| Foxn1    | -1.254 | 7.20E-04 |
| Ctdspl2  | -1.235 | 1.26E-07 |
| Skil     | -1.213 | 7.34E-05 |
| Etv4     | -1.213 | 4.06E-07 |
| Fhod3    | -1.209 | 5.00E-12 |
| Csrnp2   | -1.199 | 3.43E-10 |
| Tnfaip2  | -1.181 | 6.66E-04 |
| Pitpnc1  | -1.179 | 4.53E-11 |
| Cep170   | -1.139 | 5.11E-05 |
| Spsb4    | -1.116 | 2.77E-06 |
| Pdgfra   | -1.088 | 3.44E-03 |
| Cyp7a1   | -1.082 | 9.11E-04 |
| Coro2b   | -1.074 | 5.36E-03 |
| Akr1c14  | -1.064 | 4.34E-02 |
| Klhl30   | -1.051 | 1.86E-04 |
| Amotl1   | -1.041 | 1.72E-05 |
| Zmiz1    | -1.033 | 3.43E-08 |
| Itpripl2 | -1.026 | 9.91E-08 |
| Gm12185  | -1.013 | 7.48E-03 |

**Supplementary Table 2:** Common direct target genes of miR-200b-3p and miR-429-3p during an EMT.

The table summarizes 54 genes which are a) common, predicted direct targets of miR-200b-3p and miR-429-3p by Walk2.0 (predicted targets in at least seven out of 13 prediction databases with a predicted seed sequence in the 3'UTR, 5'UTR or CDS) and b) display reduced transcript levels upon forced expression of miR-200b-3p or miR-429-3p in NMuMG/E9 cells at 4 days of TGF $\beta$ -treatment (RNA-sequencing analysis; log<sub>2</sub>FC (-1), FDR < 0.05).

| Gene      | miR-200b-3p         |          | miR-429-3p          |          |
|-----------|---------------------|----------|---------------------|----------|
|           | log <sub>2</sub> FC | FDR      | log <sub>2</sub> FC | FDR      |
| Tubb3     | -4.031              | 5.51E-19 | -3.961              | 3.71E-18 |
| Lrp1      | -3.205              | 3.34E-39 | -3.094              | 7.73E-37 |
| Msn       | -3.139              | 4.42E-33 | -2.804              | 3.11E-27 |
| Loxl2     | -3.113              | 2.55E-19 | -2.863              | 1.49E-16 |
| Tln2      | -3.100              | 3.15E-39 | -2.736              | 1.29E-31 |
| Zeb2      | -3.090              | 2.34E-21 | -2.882              | 7.05E-19 |
| Has2      | -3.064              | 1.25E-04 | -3.056              | 1.79E-04 |
| Foxf2     | -2.834              | 5.05E-47 | -2.758              | 1.20E-44 |
| Cd1d1     | -2.817              | 2.38E-13 | -2.145              | 8.32E-08 |
| Tmprss11f | -2.771              | 8.03E-08 | -2.726              | 2.30E-07 |
| Rdh10     | -2.768              | 1.86E-18 | -2.742              | 3.98E-18 |
| Zcchc24   | -2.716              | 2.27E-09 | -2.924              | 7.04E-11 |
| Meox1     | -2.505              | 4.95E-09 | -2.613              | 1.38E-09 |
| Pkd1      | -2.363              | 9.63E-26 | -2.312              | 1.08E-24 |
| Fn1       | -2.313              | 1.50E-19 | -2.226              | 3.24E-18 |
| Pcdhb16   | -2.123              | 8.69E-14 | -2.001              | 2.73E-12 |
| Cyp1b1    | -2.091              | 2.25E-30 | -2.027              | 1.34E-28 |
| Pthlh     | -2.059              | 3.33E-07 | -2.016              | 1.17E-06 |
| Rasl12    | -1.970              | 1.10E-06 | -1.887              | 4.51E-06 |
| Chsy1     | -1.915              | 5.97E-13 | -1.765              | 3.87E-11 |
| Fnbp1     | -1.873              | 6.72E-23 | -1.761              | 2.44E-20 |
| Sema3f    | -1.839              | 2.55E-19 | -1.600              | 6.49E-15 |
| Wipf1     | -1.834              | 7.58E-20 | -1.483              | 2.15E-13 |
| Cbx4      | -1.829              | 4.45E-17 | -1.610              | 1.82E-13 |
| Cish      | -1.810              | 1.09E-22 | -1.944              | 1.34E-25 |
| Prr9      | -1.788              | 4.69E-07 | -1.609              | 2.69E-05 |
| Trps1     | -1.660              | 1.01E-07 | -1.167              | 3.06E-04 |
| Efnb2     | -1.644              | 1.94E-19 | -1.672              | 5.65E-20 |
| Msrb3     | -1.621              | 1.42E-12 | -1.502              | 7.00E-11 |
| Nuak1     | -1.613              | 1.78E-12 | -1.471              | 1.61E-10 |
| Prkab2    | -1.573              | 6.11E-10 | -1.347              | 1.62E-07 |
| Gata2     | -1.488              | 9.30E-06 | -1.459              | 2.84E-05 |
| Cast      | -1.462              | 4.69E-10 | -1.159              | 1.33E-06 |

|        |        |          |        |          |
|--------|--------|----------|--------|----------|
| Nin    | -1.430 | 9.97E-07 | -1.292 | 1.35E-05 |
| Rbfox2 | -1.372 | 2.76E-16 | -1.183 | 2.73E-12 |
| Extl3  | -1.336 | 1.45E-14 | -1.076 | 9.75E-10 |
| Aff1   | -1.333 | 6.60E-10 | -1.044 | 2.31E-06 |
| Ckap4  | -1.299 | 1.35E-10 | -1.309 | 1.13E-10 |
| Fscn1  | -1.299 | 3.13E-04 | -1.187 | 1.49E-03 |
| Lrrk2  | -1.253 | 4.20E-06 | -1.285 | 2.71E-06 |
| Wnt1   | -1.211 | 6.37E-04 | -1.120 | 9.43E-03 |
| Vash2  | -1.200 | 4.05E-07 | -1.045 | 1.51E-05 |
| Blcap  | -1.177 | 4.70E-10 | -1.162 | 9.01E-10 |
| Snai1  | -1.143 | 4.94E-04 | -1.269 | 1.07E-04 |
| Foxn3  | -1.098 | 7.01E-07 | -1.061 | 2.13E-06 |
| Nyap1  | -1.083 | 2.09E-03 | -1.013 | 4.88E-03 |
| Ubxn8  | -1.057 | 2.62E-07 | -1.061 | 3.03E-07 |
| Trio   | -1.028 | 4.03E-06 | -1.055 | 2.43E-06 |
| Col5a1 | -3.933 | 9.99E-33 | -3.651 | 9.14E-29 |
| Zeb1   | -2.958 | 8.32E-41 | -2.873 | 1.27E-38 |
| Zfp9   | -1.460 | 5.32E-08 | -1.414 | 1.81E-07 |
| Sox12  | -1.148 | 1.22E-03 | -1.092 | 2.62E-03 |
| Cdon   | -1.757 | 6.24E-19 | -1.385 | 3.64E-12 |
| Ncs1   | -1.542 | 8.90E-20 | -1.535 | 1.63E-19 |

**Supplementary Table 3:** All pre-miR miRNA precursors used in this study for the forced expression of miRNAs and functional screening.

| <b>miRNA</b>        | <b>Catalog number (Ambion)</b> |
|---------------------|--------------------------------|
| mmu-miR-1199-5p     | PM13577                        |
| hsa-miR-1199-5p     | PM26554                        |
| hsa/mmu-miR-200b-3p | PM10492                        |
| mmu-miR-429-3p      | PM10759                        |
| hsa-miR-429-3p      | PM10221                        |
| mmu-miR-145a-3p     | PM12730                        |
| mmu-miR-2137        | PM15897                        |
| mmu-miR-486-5p      | PM10546                        |
| mmu-miR-3107-5p     | PM10546                        |
| mmu-miR-181a-5p     | PM10421                        |
| mmu-miR-6944-3p     | PM27934                        |
| mmu-miR-145a-5p     | PM11480                        |
| mmu-miR-125b-5p     | PM10148                        |
| mmu-miR-206-3p      | PM10409                        |
| mmu-miR-139-5p      | PM12466                        |
| mmu-miR-181b-2-3p   | PM20146                        |
| mmu-miR-101b-5p     | PM20094                        |
| mmu-miR-181a-2-3p   | PM12578                        |
| mmu-miR-125b-2-3p   | PM12421                        |
| mmu-miR-143-3p      | PM10883                        |
| mmu-miR-1247-3p     | PM19654                        |
| mmu-miR-7a-5p       | PM10047                        |
| mmu-miR-218-5p      | PM10328                        |
| mmu-miR-200a-3p     | PM10991                        |
| mmu-miR-210-5p      | PM20577                        |
| mmu-miR-504-5p      | PM12429                        |
| mmu-miR-30c-5p      | PM11060                        |
| mmu-miR-1968-5p     | PM14972                        |
| mmu-miR-1199-3p     | PM19640                        |
| mmu-miR-200b-5p     | PM12857                        |
| mmu-miR-200a-5p     | PM10250                        |
| mmu-miR-802-3p      | PM20311                        |
| mmu-miR-1247-5p     | PM13197                        |
| mmu-miR-802-5p      | PM11932                        |



**Supplementary Table 4:** List of oligonucleotides used for quantitative RT-PCR

| Name           | fwd. primer (5` - 3`)    | rev. primer (5` - 3`)  |
|----------------|--------------------------|------------------------|
| Murine genes   |                          |                        |
| mRpl19         | ctcgttgccggaaaaaca       | tcatccaggtcaccttctca   |
| mCdh1          | cgaccctgcctctgaatcc      | tacacgctgggaaacatgagc  |
| mFibronectin   | cccagacttatggtggcaatt    | aatttccgcctcgagtctga   |
| mVimentin      | ccaaccttttctccctgaa      | ttgagtgggtgtcaaccaga   |
| mZeb1          | gccagcagtcgatgaaaa       | tatcacaatacgggcaggtg   |
| mZeb2          | ggaggaaaaaacgtggtgaactat | gcaatgtgaagcttgcctctt  |
| mSox4          | cctcgctctcctcgctct       | tcgtcttgaactcgtcgt     |
| m2210011C24Rik | agatgcaacgggacatcg       | gcgcttgagttcgtccag     |
| Human genes    |                          |                        |
| hRpl19         | gatgccggaaaaaacaccttg    | tggctgtacccttccgctt    |
| hCdh1          | agaacgcattgccacatacact   | tctgatcggttaccgtgatcaa |
| hFibronectin   | gaactatgatgccgaccagaa    | ggttgtgcagatttctcgt    |
| hCdh2          | tagtcaccgtggtcaaaccaat   | gtgctgaattcccttggtaat  |
| hZeb1          | gccaacagaccagacagtgtt    | tcttgccttctcttctcg     |
